# Supplementary material
Source: PubMed Central journal article supplement (PMC3255632)
Supplement: supp_78.1.227_AEM-AEM06094-11-s01.pdf [file supp_78.1.227_AEM-AEM06094-11-s01.pdf]

| Assay                   | Primers                      | Sequence (5' - 3')                                   | Size | <i>E</i>         | <i>r</i> <sup>2</sup> | <i>T</i> <sub>m</sub> |
|-------------------------|------------------------------|------------------------------------------------------|------|------------------|-----------------------|-----------------------|
| ABPV                    | ABPV-F6548<br>KIABPV-B6707   | TCATACCTGCCGATCAAG<br>CTGAATAATACTGTGCGTATC          | 197  |                  |                       | 81.0 °C               |
| BQCV                    | BQCV-qF7893<br>BQCV-qB8150   | AGTGGCGGAGATGTATGC<br>GGAGGTGAAGTGGCTATATC           | 294  | 1.878 ±<br>0.057 | 0.990                 | 80.5 °C               |
| CBPV                    | CBPV1-qF1818<br>CBPV1-qB2077 | CAACCTGCCTCAACACAG<br>AATCTGGCAAGGTTGACTGG           | 296  |                  |                       | 84.0 °C               |
| DWV                     | DWV-F8668<br>DWV-B8757       | TTCATTAAAGCCACCTGGAACATC<br>TTTCCTCATTAACTGTGTCGTTGA | 136  | 1.799 ±<br>0.027 | 0.992                 | 79.5 °C               |
| IAPV                    | IAPV-F6627<br>KIABPV-B6707   | CCATGCCTGGCGATTAC<br>CTGAATAATACTGTGCGTATC           | 203  |                  |                       | 81.0 °C               |
| KBV                     | KBV-F6639<br>KIABPV-B6707    | CCATACCTGCTGATAACC<br>CTGAATAATACTGTGCGTATC          | 200  |                  |                       | 81.5 °C               |
| SBV                     | SBV-qF3164<br>SBV-qB3461     | TTGGAACCTACGCATTCTCTG<br>GCTCTAACCTCGCATCAAC         | 335  | 1.742 ±<br>0.097 | 0.974                 | 80.3 °C               |
| SBPV                    | SBPV-F3177<br>SBPV-B3363     | GCGCTTTAGTTCAATTGCC<br>ATTATAGGACGTGAAAATATAC        | 226  |                  |                       | 78.5 °C               |
| VDV-1                   | VDV-F1409<br>DWV-B1806       | GCCCTGTTCAAGAACATG<br>CTTTTCTAATTCAACTTCACC          | 413  |                  |                       | 80.5 °C               |
| VdMLV                   | AmVdMLV-F<br>AmVdMLV-R       | ATCCCTTTTCAGTTCGCT<br>AGAAGAGACTTCAAGGAC             | 438  |                  |                       | 86.5 °C               |
| β-actin ( <i>A.m.</i> ) | Am-actin2-qF<br>Am-actin2-qB | CGTGCCGATAGTATTCTTG<br>CTTCGTCACCAACATAGG            | 271  | 1.923 ±<br>0.084 | 0.987                 | 85.1 °C               |
| β-actin ( <i>V.d.</i> ) | Vd-actin-qF<br>Vd-actin-qB   | CGACGGTCAGGTCATCAC<br>GTTGAGGGAGCCAAAGAGG            | 243  | 1.917 ±<br>0.025 | 0.997                 | 82.5 °C               |
